# Supplementary material for: Flux Growth, Crystal Structure, and Chemical Bonding of Yb2PdGe3, an AlB2 Superstructure within the Rare-Earth Series
Source: PubMed Central journal article supplement (PMC9906778; doi:10.1021/acs.inorgchem.2c03303), 2023-01-20
Supplement: ic2c03303_si_001.pdf [file ic2c03303_si_001.pdf]

# Supporting Information

## **Flux growth, crystal structure and chemical bonding of $\text{Yb}_2\text{PdGe}_3$ , an $\text{AlB}_2$ superstructure within the rare earth series**

Riccardo Freccero<sup>1\*</sup>, Laura C. J. Pereira<sup>2</sup>, Pavlo Solokha<sup>1</sup>, Serena De Negri<sup>1</sup>

*<sup>1</sup>Università degli Studi di Genova, Dipartimento di Chimica e Chimica Industriale,  
Via Dodecaneso 31, I-16146 Genova, Italy*

*<sup>2</sup>Centro de Ciências e Tecnologias Nucleares, Department of Engenharia e Ciências Nucleares,  
Instituto Superior Técnico, Universidade Lisboa, Estrada Nacional 10, 2695-066 Bobadela,  
Portugal*

\* To whom the correspondence should be addressed: Riccardo Freccero; E-mail: riccardo.freccero@unige.it

**Table S1.** SEM/EDXS (at.%) and XRD data on the investigated RE-Pd-Ge samples (annealed at 800°C for 3 weeks). When the Pearson symbol is not reported the number of peaks in the powder diffraction pattern was not sufficient to unambiguously assign it. Asterisks (\*) indicate samples containing unknown phases.

| RE         | Global EDXS<br>Composition [at%] |      |      | Phases                                                                                                          | EDXS Composition<br>[at%] |                                                                          |                      | Crystal<br>Structure                                                                                                                          | Lattice Parameters<br>[Å] |              |
|------------|----------------------------------|------|------|-----------------------------------------------------------------------------------------------------------------|---------------------------|--------------------------------------------------------------------------|----------------------|-----------------------------------------------------------------------------------------------------------------------------------------------|---------------------------|--------------|
|            | RE                               | Pd   | Ge   |                                                                                                                 | RE                        | Pd                                                                       | Ge                   |                                                                                                                                               | a                         | c            |
|            | <b>Y*</b>                        | 34.1 | 16.8 |                                                                                                                 | 49.1                      | Y(Pd <sub>x</sub> Ge <sub>1-x</sub> ) <sub>2</sub><br>YPdGe <sub>2</sub> | 34.8<br>23.5         |                                                                                                                                               | 17.7<br>22.6              | 47.5<br>53.9 |
| <b>La</b>  | 33.4                             | 17.2 | 49.4 | La(Pd <sub>x</sub> Ge <sub>1-x</sub> ) <sub>2</sub><br>LaPdGe <sub>2</sub>                                      | 33.5<br>25.5              | 17.1<br>24.8                                                             | 49.4<br>49.7         | <i>tI12</i> -ThSi <sub>2</sub><br><i>oS16</i> -CeNiSi <sub>2</sub>                                                                            | 4.293(1)                  | 14.891(4)    |
| <b>Ce</b>  | 33.6                             | 17.5 | 48.9 | Ce(Pd <sub>x</sub> Ge <sub>1-x</sub> ) <sub>2</sub><br>Ce <sub>2</sub> Pd <sub>3</sub> Ge <sub>5</sub>          | 34.1<br>21.4              | 17.4<br>30.3                                                             | 48.5<br>48.3         | <i>tP12</i> -CePd <sub>0.5</sub> Ge <sub>1.5</sub>                                                                                            | 4.247(2)                  | 14.801(7)    |
| <b>Pr</b>  | 31.1                             | 18.5 | 50.4 | Pr(Pd <sub>x</sub> Ge <sub>1-x</sub> ) <sub>2</sub><br>Pr <sub>2</sub> Pd <sub>3</sub> Ge <sub>5</sub>          | 31.7<br>18.5              | 17.8<br>32.1                                                             | 50.6<br>49.4         | <i>hP3</i> -AlB <sub>2</sub><br><i>oI40</i> -U <sub>2</sub> Co <sub>3</sub> Si <sub>5</sub>                                                   | 4.245(1)                  | 4.219(2)     |
| <b>Nd</b>  | 32.8                             | 17.7 | 49.8 | Nd(Pd <sub>x</sub> Ge <sub>1-x</sub> ) <sub>2</sub><br>Nd <sub>2</sub> Pd <sub>3</sub> Ge <sub>5</sub>          | 32.6<br>19.7              | 17.0<br>30.8                                                             | 50.4<br>49.5         | <i>hP3</i> -AlB <sub>2</sub><br><i>oI40</i> -U <sub>2</sub> Co <sub>3</sub> Si <sub>5</sub>                                                   | 4.233(1)                  | 4.185(1)     |
| <b>Sm</b>  | 30.9                             | 17.5 | 51.6 | Sm(Pd <sub>x</sub> Ge <sub>1-x</sub> ) <sub>2</sub><br>SmPdGe <sub>2</sub><br>Sm <sub>2</sub> PdGe <sub>6</sub> | 33.4<br>24.1<br>21.9      | 17.5<br>26.8<br>12.1                                                     | 49.1<br>49.1<br>66.0 | <i>hP3</i> -AlB <sub>2</sub><br><i>oI40</i> -U <sub>2</sub> Co <sub>3</sub> Si <sub>5</sub><br><i>oS18</i> -Ce <sub>2</sub> CuGe <sub>6</sub> | 4.212(1)                  | 4.117(1)     |
| <b>Gd*</b> | 32.9                             | 16.8 | 50.3 | Gd(Pd <sub>x</sub> Ge <sub>1-x</sub> ) <sub>2</sub><br>Gd <sub>2</sub> PdGe <sub>6</sub>                        | 33.6<br>22.9              | 18.8<br>12.4                                                             | 47.6<br>64.7         | <i>hP3</i> -AlB <sub>2</sub>                                                                                                                  | 4.207(1)                  | 4.052(1)     |
| <b>Tb*</b> | 33.1                             | 17.3 | 49.6 | Tb(Pd <sub>x</sub> Ge <sub>1-x</sub> ) <sub>2</sub>                                                             | 33.0                      | 20.5                                                                     | 46.5                 | <i>hP3</i> -AlB <sub>2</sub>                                                                                                                  | 4.216(1)                  | 3.981(1)     |
| <b>Dy*</b> | 32.2                             | 18.1 | 49.7 | Dy(Pd <sub>x</sub> Ge <sub>1-x</sub> ) <sub>2</sub><br>Dy <sub>2</sub> PdGe <sub>6</sub>                        | 33.1<br>23.1              | 22.0<br>12.4                                                             | 44.9<br>64.5         | <i>hP3</i> -AlB <sub>2</sub>                                                                                                                  | 4.229(1)                  | 3.906(1)     |
| <b>Ho*</b> | 37.6                             | 17.6 | 44.8 | Ho(Pd <sub>x</sub> Ge <sub>1-x</sub> ) <sub>2</sub>                                                             | 34.2                      | 22.6                                                                     | 43.2                 | <i>hP3</i> -AlB <sub>2</sub>                                                                                                                  | 4.231(1)                  | 3.851(1)     |
| <b>Er*</b> | 35.7                             | 9.8  | 54.5 | Er(Pd <sub>x</sub> Ge <sub>1-x</sub> ) <sub>2</sub>                                                             | 31.3                      | 21.5                                                                     | 47.2                 | <i>hP3</i> -AlB <sub>2</sub>                                                                                                                  | 4.239(1)                  | 3.789(1)     |
| <b>Yb</b>  | 33.6                             | 18.4 | 48.0 | Yb <sub>2</sub> PdGe <sub>3</sub>                                                                               | 34.6                      | 16.9                                                                     | 48.5                 | <i>hP12</i> -Ce <sub>2</sub> CoSi <sub>3</sub>                                                                                                | 8.463(1)                  | 4.073(1)     |

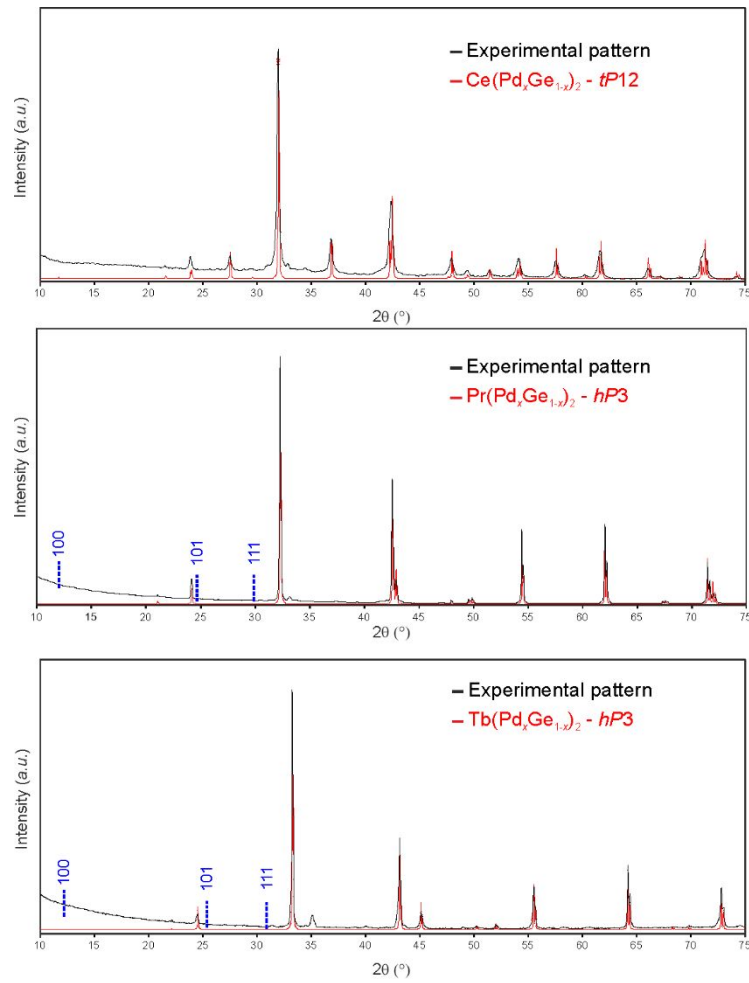

**Figure S1.** X-ray powder patterns for the Ce-Pd-Ge, Pr-Pd-Ge, and Tb-Pd-Ge samples selected as representatives for light and heavy *RE*. Blue dashed lines for *RE* = Pr, Tb point out both the positions and Miller indexes of the missing super-reflections for the hypothetical  $RE_2PdGe_3$  ordered compound.

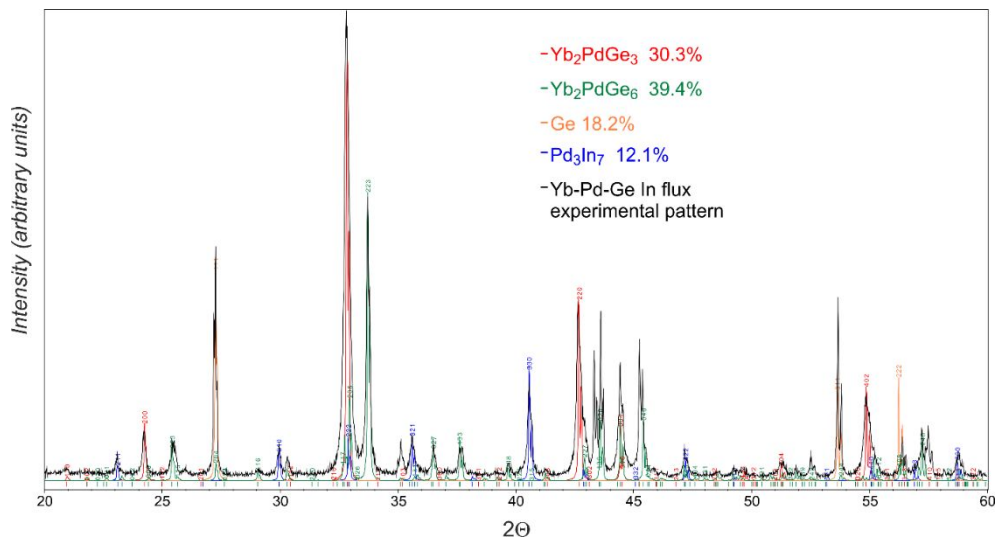

**Figure S2.** X-ray powder pattern for the Yb-Pd-Ge sample synthesized in metal flux after In removal

**Table S2.** Interatomic distances for  $\text{Ge}_6\text{H}_6$  and  $\text{Ge}_6^{6-}$  optimized employing different exchange-correlation functional ( $f_{\text{xc}}$ ): the Perdew and Wang (PW) for the local-density approximation (LDA), the Perdew, Burke and Ernzerhof (PBE) for the generalized-gradient approximation (GGA), and the B3LYP hybrid functional.

| Compound                | $f_{\text{xc}}$ | $d_{\text{Ge-Ge}}$ [Å] | $d_{\text{Ge-H}}$ [Å] |
|-------------------------|-----------------|------------------------|-----------------------|
| $\text{Ge}_6\text{H}_6$ | pw              | 2.26                   | 1.53                  |
|                         | pbe             | 2.30                   | 1.53                  |
|                         | b3lyp           | 2.29                   | 1.52                  |
| $\text{Ge}_6^{6-}$      | pw              | 2.68                   | /                     |
|                         | pbe             | 2.77                   |                       |
|                         | b3lyp           | 2.77                   |                       |

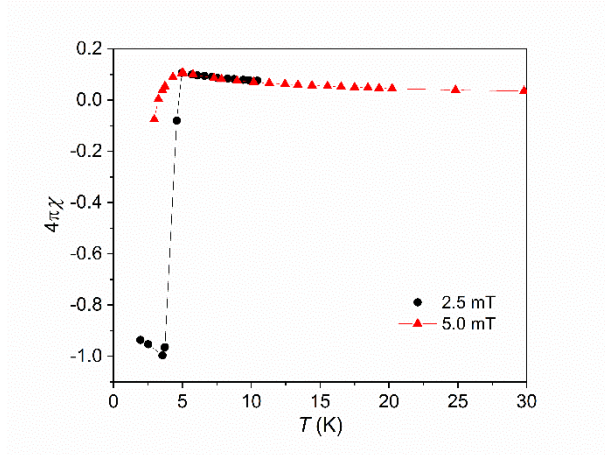

**Figure S3.** Superconducting volume fraction of  $\text{Yb}_2\text{PdGe}_3$  at 2.5 and 5.0 mT.

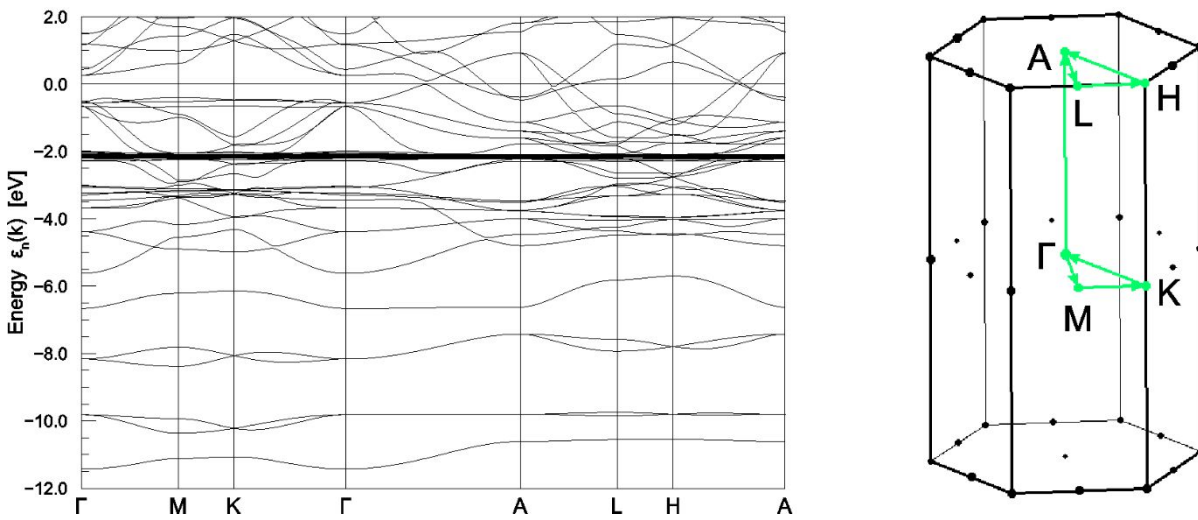

**Figure S4.** Band structure and first Brillouin zone for  $\text{Yb}_2\text{PdGe}_3$ . The selected  $k$ -path, indicated by green arrows, and the  $\Gamma$  (0, 0, 0), M ( $\frac{1}{2}$ , 0, 0), K ( $\frac{2}{3}$ ,  $\frac{1}{3}$ , 0), A (0, 0,  $\frac{1}{2}$ ), L ( $\frac{1}{2}$ , 0,  $\frac{1}{2}$ ) and H ( $\frac{2}{3}$ ,  $\frac{1}{3}$ ,  $\frac{1}{2}$ ) symmetry points and lines are shown into the Brillouin zone.

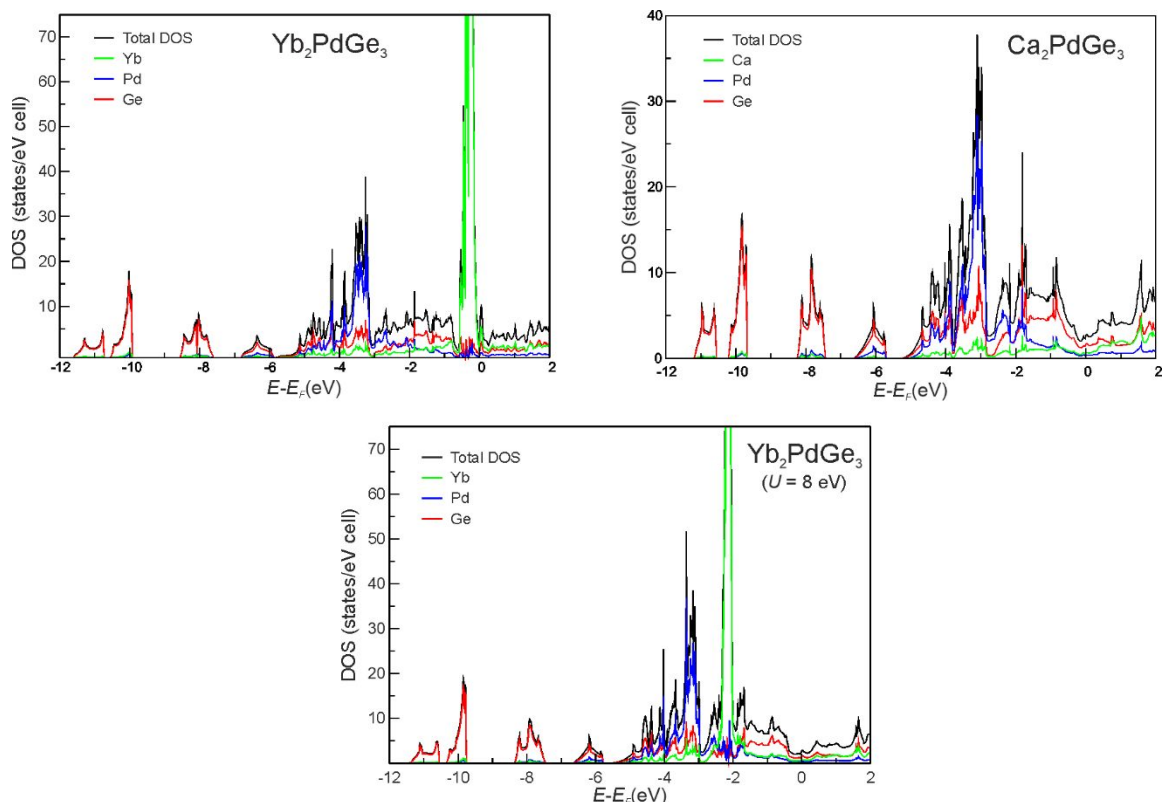

**Figure S5.** Total and atom-projected Density of States (DOS/*p*DOS) for  $\text{Yb}_2\text{PdGe}_3$  (top left) and  $\text{Ca}_2\text{PdGe}_3$  (top right) calculated at a DFT/LSDA (PW) level of theory. The  $4f$  states of the Yb species are located close to  $E_F$ , as expected when a Hubbard  $U$  parameter is not employed. To enable a better comparison among the DOS curves, that for  $\text{Yb}_2\text{PdGe}_3$  generated with a DFT +  $U$  treatment is also shown (bottom).

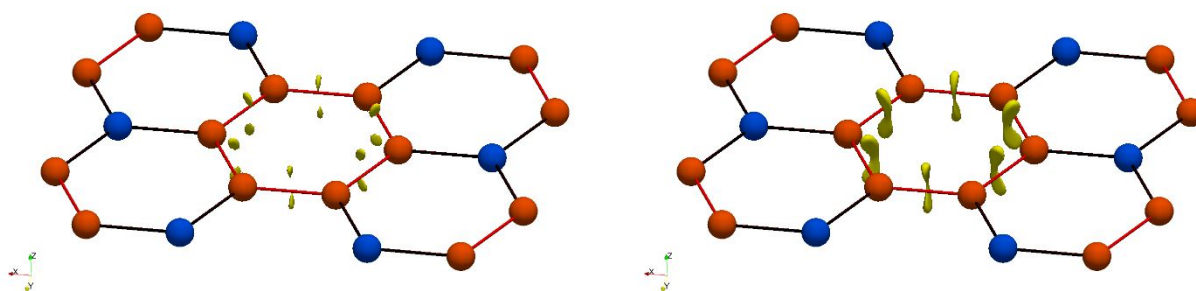

**Figure S6.** Isosurfaces generated with ELI-D values of 1.215 (left) and 1.210 (right).

A splitting of the ELI-D attractors occurs for Ge–Ge interactions, so that there are two instead of one along the germanium homocontacts, being symmetrically located above and below them with respect to the honeycomb Ge/Pd layer (Figure S6, left). They merge into one reducible localization domain (Figure S6, right) at a slightly lower ELI-D value, i.e. 0.01, than at the attractor. A similar feature was described for the calculated ELF of the  $\text{SrGa}_2$  and  $\text{BaGa}_2$  gallides<sup>1</sup> along the Ga–Ga contacts. Interestingly, the same does not hold for metal diborides<sup>2</sup> nor for benzene<sup>3</sup>, probably suggesting that

this splitting is more prone to occur moving down along the periodic table groups. Since this very tiny effect does not affect the overall bonding interpretation, one basin set was generated for each Ge–Ge bonding (purple basin in Figure 9c).

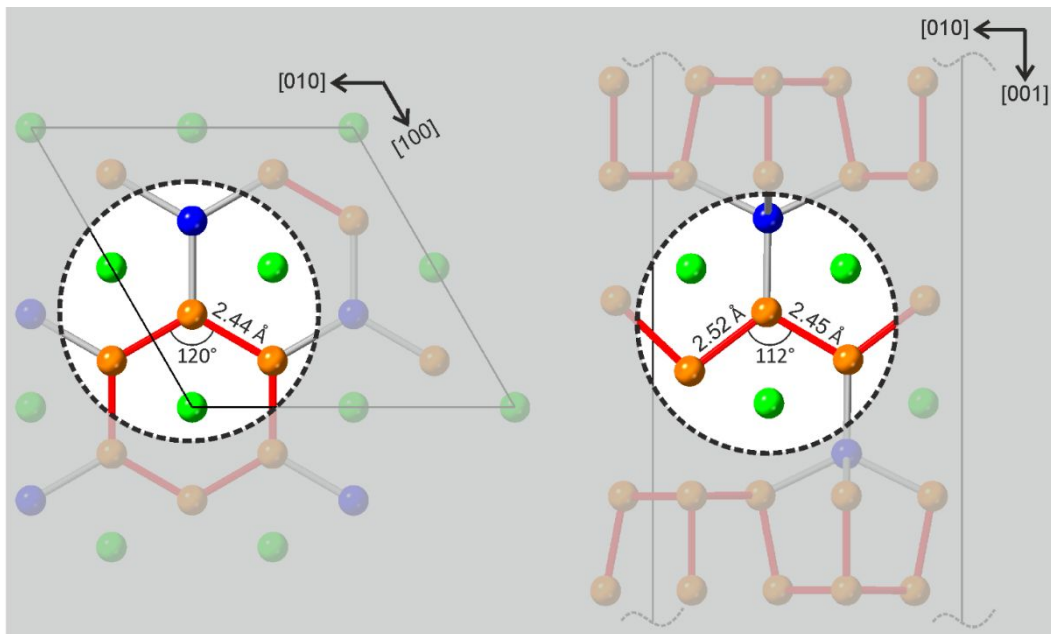

**Figure S7.** Structural similarities among the coordination environments of Ge species within  $\text{Yb}_2\text{PdGe}_3$  and  $\text{Y}_2\text{PdGe}_6$ .

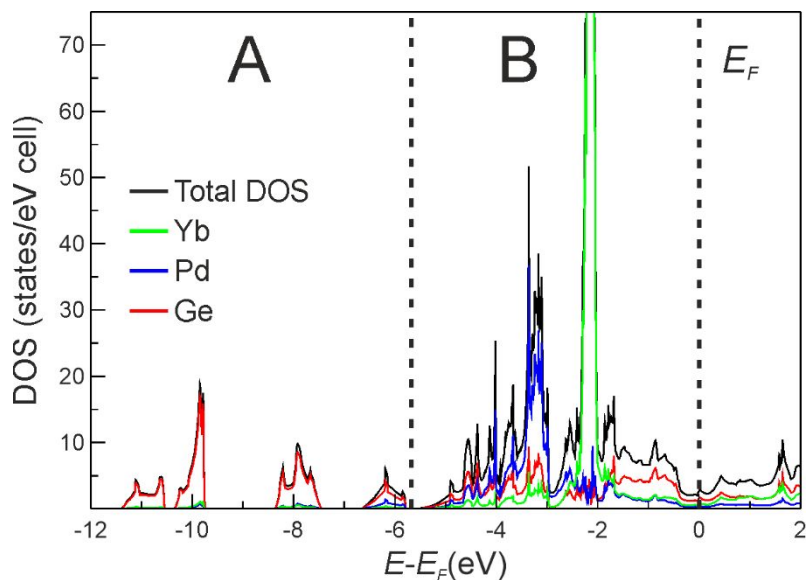

**Figure S8.** DOS and  $p$ DOS for  $\text{Yb}_2\text{PdGe}_3$  (DFT+ $U$ ). The A and B regions selected for the partial ELI-D (pELI) calculation are highlighted.

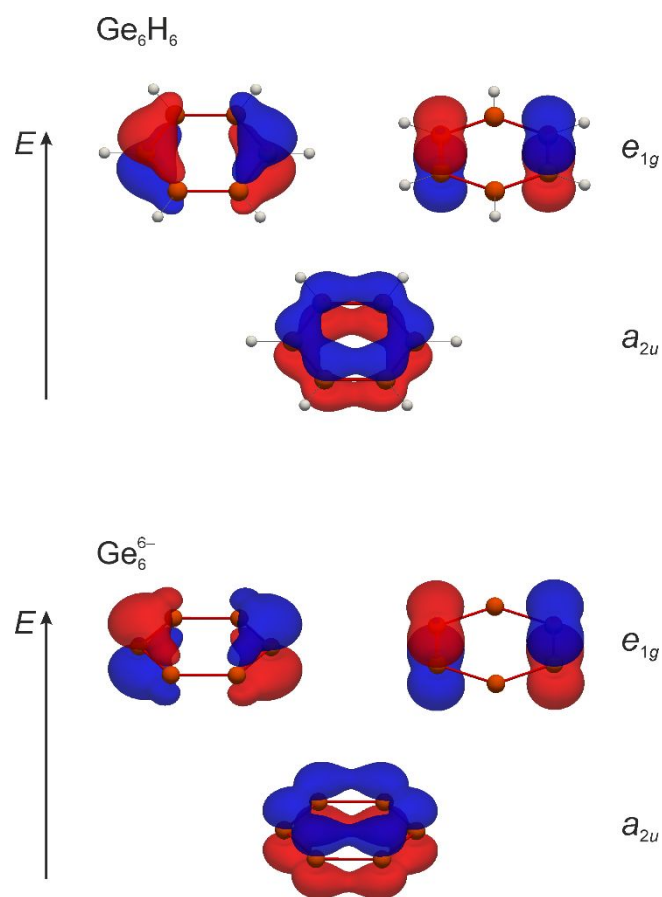

**Figure S9.** The  $a_{2u}$  and  $e_{1g}$   $\pi$  Kohn-Sham orbitals for the  $\text{Ge}_6\text{H}_6$  and  $\text{Ge}_6^{6-}$  molecules. Orbitals are represented by means of isosurfaces with absolute values of 0.040 and 0.030  $e/\text{bohr}^3$  for  $\text{Ge}_6\text{H}_6$  and  $\text{Ge}_6^{6-}$ , respectively. Blue and red denote positive and negative values, respectively.
